# Supplementary material for: Cellular androgen content influences enzalutamide agonism of F877L mutant androgen receptor
Source: PubMed Central journal article supplement (PMC5130036; doi:10.18632/oncotarget.9816), 2016-06-03
Supplement: oncotarget-07-40690-s001.pdf [file oncotarget-07-40690-s001.pdf]

## Cellular androgen content influences enzalutamide agonism of F877L mutant androgen receptor

### SUPPLEMENTARY FIGURES AND TABLES

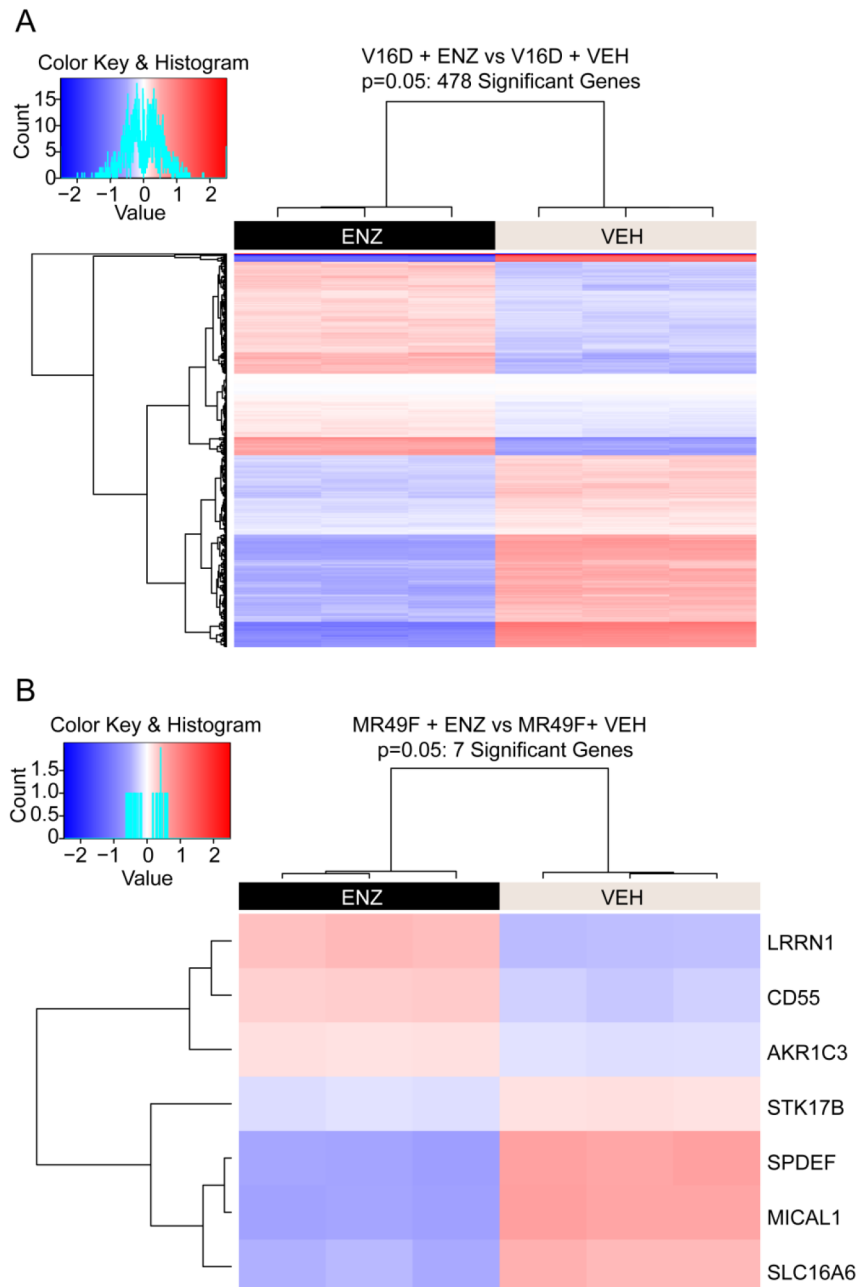

**Supplementary Figure S1: Gene expression changes after enzalutamide treatment of V16D or MR49F cells grown in androgen-replete conditions.** Heat map of RNA-seq data (see Figure 1E). **A.** There are 478 significant gene expression changes after 24 hour enzalutamide (10  $\mu$ M) treatment of V16D cells. **B.** In contrast, only seven genes showed significant expression changes after enzalutamide treatment of MR49F cells. Expression data per gene represents the mean log<sub>2</sub>-transformed FPKM values of three biological replicates. After filtering based on variance, we used a t-test to determine significant differentially expressed genes in the enzalutamide-treated vs. vehicle-treated condition (FDR-adjusted p-value  $\leq 0.05$ ).

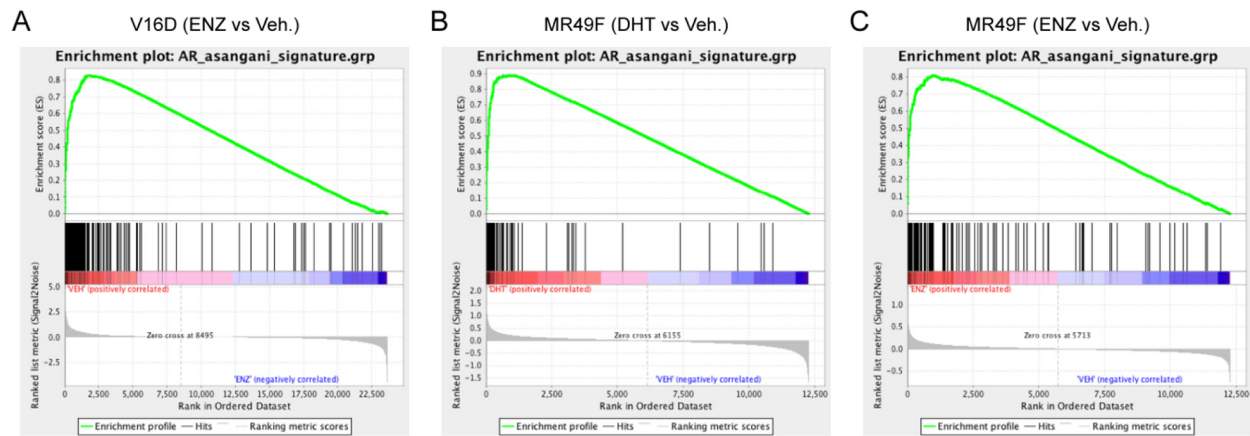

**Supplementary Figure S2: Gene set enrichment analysis demonstrates strong enrichment of an AR transcriptional signature with enzalutamide or DHT treatment.** Gene set enrichment analysis (GSEA) was performed on RNA-seq data. **A.** V16D cells treated with 10  $\mu$ M enzalutamide for 24 hours (see Figure 1E, Figure S1A) showed a significant enrichment (normalized enrichment score = -1.24, q-value = 0.096) for a previously reported AR target gene signature (15) in comparison to vehicle treatment. **B, C.** MR49F were cells grown in androgen-depleted medium and treated with either (B) 1 nM DHT or (C) 10  $\mu$ M enzalutamide for 24 hours (see Figure 2E). For both treatments, there was significant enrichment (NES = 1.02, 1.088 and q-values=0.099, 0.092 respectively) with the previously reported AR target gene signature (15). GSEA analysis was run on genome-wide expression data representing 3 biological replicates per treatment condition with 1000 phenotype permutations against the AR target gene signature of interest (15).

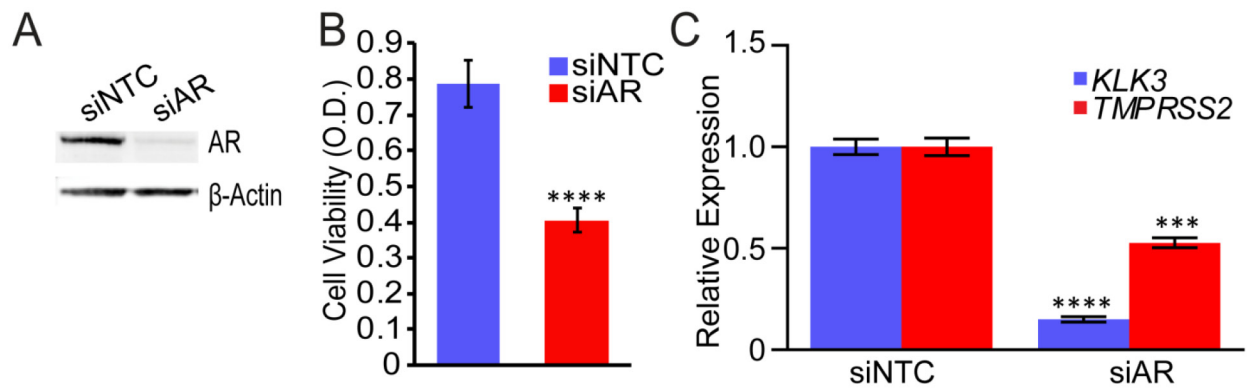

**Supplementary Figure S3: Enzalutamide-resistant MR49F cells are still AR-dependent.** MR49F cells were grown in full serum supplemented with 10  $\mu$ M enzalutamide. **A.** siRNA was used to knockdown AR, and samples were collected 96 hours later. **B.** Cell viability was measured using MTS assays, and **C.** expression of AR targets was measured by RT-qPCR. MTS data are the means of 12 biological replicates; error bars represent standard deviations. \*\*\*\* =  $p \leq 0.0001$ , unpaired 2-tailed t-test. RT-qPCR data are mean RQ ( $\Delta\Delta C_t$  method) of three biological replicates; positive and negative error bars represent SEM. \*\*\* =  $p \leq 0.001$ , \*\*\*\* =  $p \leq 0.0001$ , unpaired 2-tailed t-test. Comparisons are between siNTC and siAR.

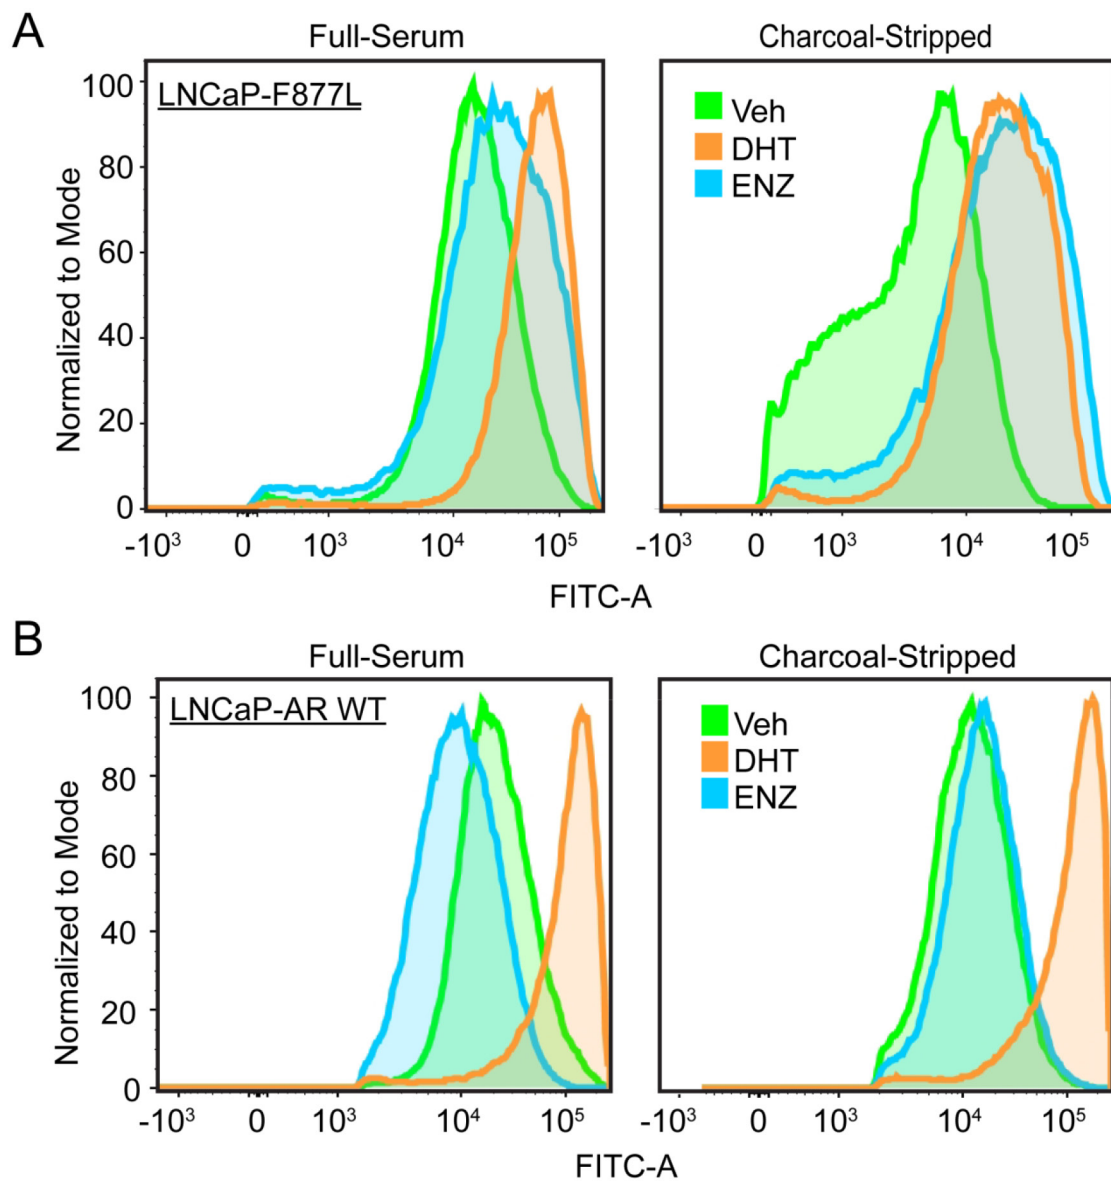

**Supplementary Figure S4: Enzalutamide agonism of AR reporter activity is restricted to mutant F877L AR.** **A.** Flow cytometry histograms of LNCaP-F877L cells from Figure 2E grown in either androgen-replete serum or androgen-depleted, charcoal-stripped serum. **B.** Flow cytometry histograms of LNCaP cells stably expressing ectopic wild-type AR and the probasin-GFP reporter.

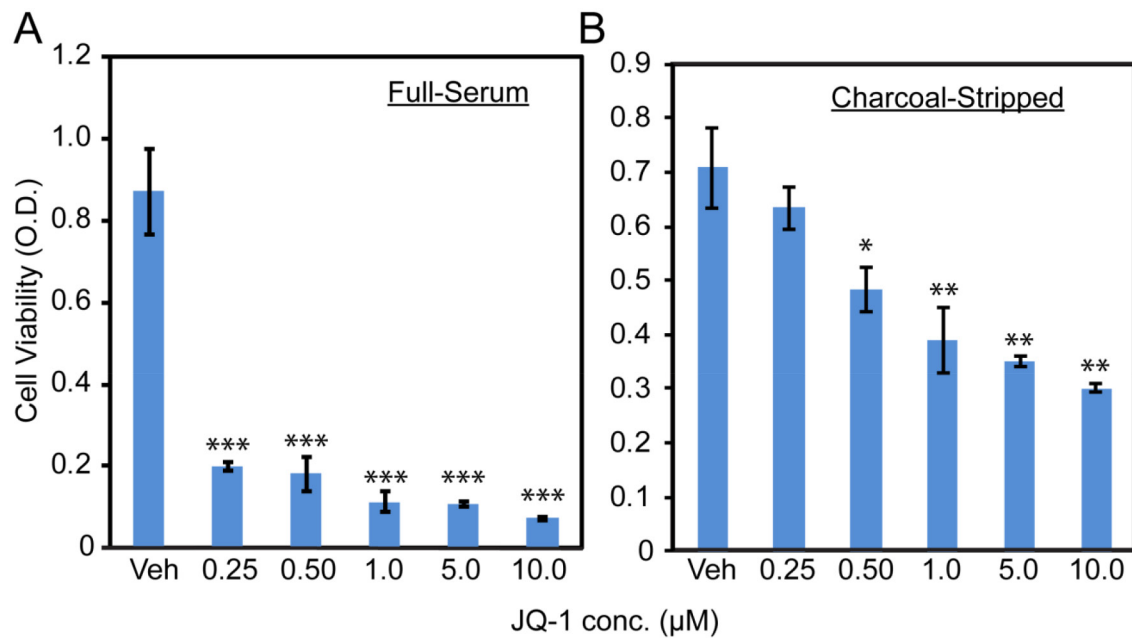

**Supplementary Figure S5: The growth-inhibitory effects of JQ-1 treatment are most pronounced in androgen-replete conditions.** MTS assay of viability in MR49F cells grown in androgen-replete serum **A.** or charcoal-stripped serum **B.** treated with dose escalation of JQ-1 for 6 days. Data are mean of three biological replicates; positive and negative error bars represent standard deviations. \* =  $p \leq 0.05$ , \*\* =  $p \leq 0.01$ , \*\*\* =  $p \leq 0.001$ , unpaired 2-tailed t-test.

**Supplementary Table S1: Top 10 gene ontology (GO) categories enriched in the 358 conserved, differentially-expressed genes after DHT or enzalutamide treatment**

| Category         | Term                                                  | p-value  |
|------------------|-------------------------------------------------------|----------|
| SP_PIR_KEYWORDS  | DNA replication                                       | 1.10E-14 |
| GOTERM_BP_5      | GO:0006260~DNA replication                            | 4.40E-14 |
| GOTERM_BP_5      | GO:0006259~DNA metabolic process                      | 7.54E-13 |
| GOTERM_BP_4      | GO:0006259~DNA metabolic process                      | 7.55E-13 |
| REACTOME_PATHWAY | REACT_383:DNA replication                             | 1.88E-11 |
| SP_PIR_KEYWORDS  | Cell cycle                                            | 3.18E-11 |
| REACTOME_PATHWAY | REACT_152:Cell Cycle, Mitotic                         | 1.77E-10 |
| UP_SEQ_FEATURE   | Domain:MCM                                            | 7.54E-10 |
| INTERPRO         | IPR018525:DNA-dependent ATPase<br>MCM, Conserved site | 1.01E-09 |
| SP_PIR_KEYWORDS  | ATP-binding                                           | 1.51E-09 |

**Supplementary Table S2: Top 10 gene ontology (GO) categories enriched in the 57 genes with at least a 2-fold change in expression with JQ-1 co-treatment vs. treatment with either enzalutamide or DHT alone**

| Category         | Term                                           | p-value  |
|------------------|------------------------------------------------|----------|
| GOTERM_BP_5      | GO:0006260~DNA replication                     | 2.69E-05 |
| SP_PIR_KEYWORDS  | DNA replication                                | 1.17E-04 |
| GOTERM_BP_5      | GO:0006259~DNA metabolic process               | 1.55E-04 |
| GOTERM_BP_4      | GO:0006259~DNA metabolic process               | 1.98E-04 |
| UP_SEQ_FEATURE   | Sequence variant                               | 0.004585 |
| GOTERM_BP_5      | GO:0051052~Regulation of DNA metabolic process | 0.005569 |
| GOTERM_BP_4      | GO:0051052~Regulation of DNA metabolic process | 0.006056 |
| SP_PIR_KEYWORDS  | Polymorphism                                   | 0.008224 |
| SP_PIR_KEYWORDS  | Cell cycle                                     | 0.010069 |
| REACTOME_PATHWAY | REACT_383:DNA Replication                      | 0.011466 |
